# Supplementary material for: Self-bonding and the electrochemical properties of silica-coated nanowires composed of cobalt-coordinated peptide bundles
Source: Royal Society of Chemistry journal article supplement (doi:10.1039/c7tb01118k), 2017-01-01

Support information for:

## **Self-bonding and electrochemical properties of silica-coated nanowire composed of cobalt-coordinated peptide bundles**

Kazuki Murai,<sup>\*,a</sup> Yusuke Yamamoto,<sup>b</sup> Takatoshi Kinoshita,<sup>c</sup>  
Kenji Nagata,<sup>b</sup> and Masahiro Higuchi,<sup>\*,b</sup>

<sup>a</sup> *Department of Materials Science and Technology, Faculty of Industrial Science and Technology, Tokyo University of Science, 6-3-1 Nijuku, Katsushika-ku, Tokyo 125-8585, Japan.*

<sup>b</sup> *Department of Life Science and Applied Chemistry, Graduate School of Engineering, Nagoya Institute of Technology, Gokiso-cho, Showa-ku, Nagoya 466-8555, Japan.*

<sup>c</sup> *Nagoya Institute of Technology, Gokiso-cho, Showa-ku, Nagoya 466-8555, Japan.*

*\* Corresponding authors: murai.kazuki@rs.tus.ac.jp (Dr. K. Murai) and  
higuchi.masahiro@nitech.ac.jp (Prof. Dr. M. Higuchi)*

### **Contents**

1. **S1.** MALDI-TOF-MS spectra of the Pep23 and Lipo-Pep23.
2. **S2.** CD spectra of the Pep23 and Lipo-Pep23 in ethanol.
3. **S3.** UV-vis spectrum of the mixture containing the Pep23 and Co(II) ion.
4. **S4.** Time dependence changes of absorbance at 530 nm of the Pep23 in ethanol after the addition of Co(II).
5. **S5.** TEM image of the (a) Co(II)-coordinated Pep23 bundle and schematic pictures of (b)  $\alpha$ -helical Pep23 and (c) Co(II)-coordinated Pep23 bundle.
6. **S6.** MALDI-TOF-MS spectrum of the product obtained by mixing of the Pep23 and TMEOS.
7. **S7.** I-V curves of the Co(II)-coordinated Pep23 nanowires bonded between the Lipo-Pep23-modified IDA electrodes prepared under the same experimental condition.

**S1.** MALDI-TOF-MS spectra of the Pep23 and Lipo-Pep23.

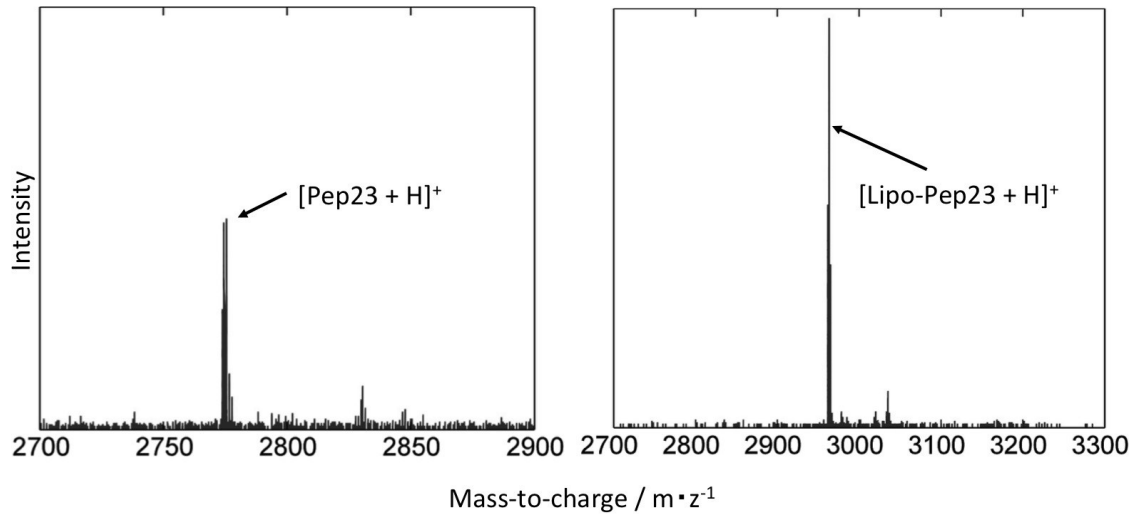

S2. CD spectra of Pep23 and Lipo-Pep23 in ethanol.

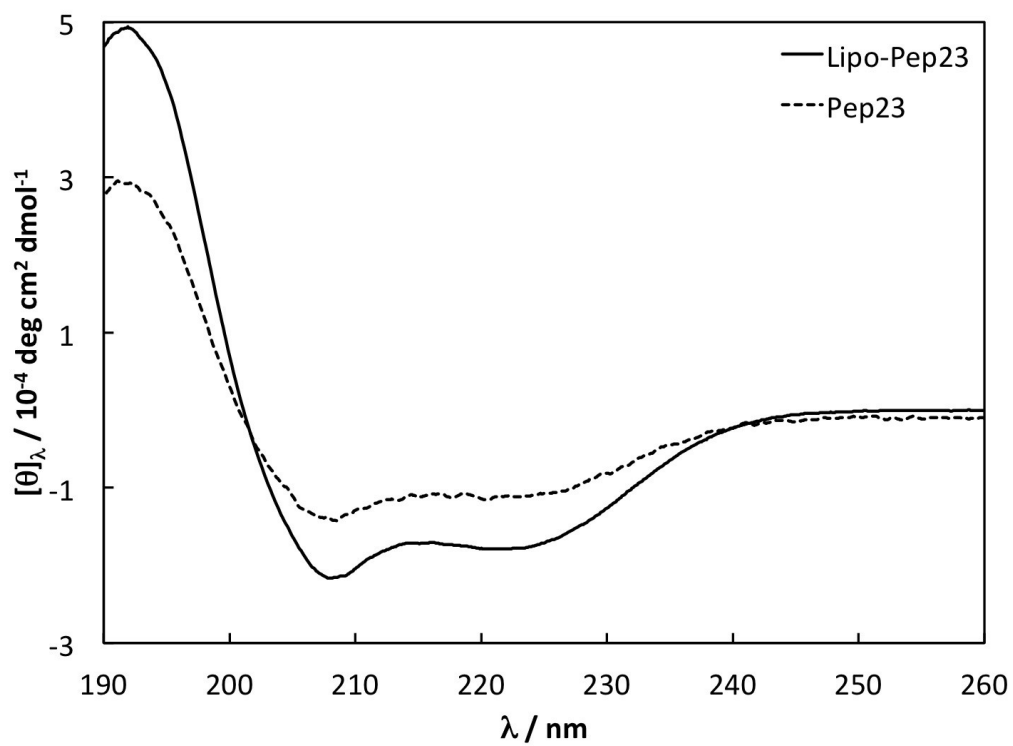

| Peptide    | Conformation / % |                |             |
|------------|------------------|----------------|-------------|
|            | $\alpha$ -helix  | $\beta$ -sheet | Random coil |
| Pep23      | 50               | 25             | 25          |
| Lipo-Pep23 | 47               | 21             | 32          |

**S3.** UV-vis spectrum of the mixture containing the Pep23 and Co(II) ion.

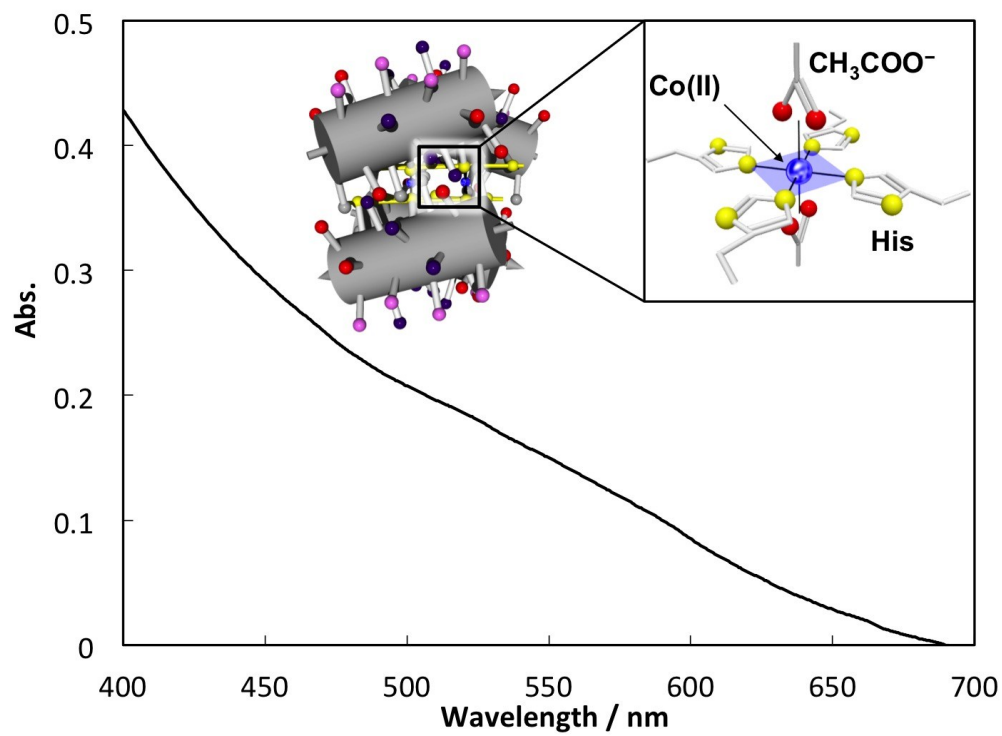

The molar ration of the Pep23 to Co(II), [Co(II)]/[His], was 0.25. The measurement was performed immediately after the added Co(II) ion.

**S4.** Time dependence changes of absorbance at 530 nm of the Pep23 in ethanol after the addition of Co(II).

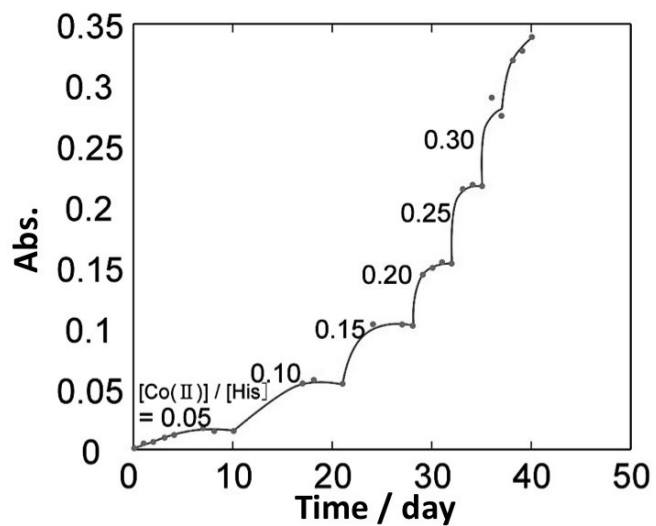

Co(II) ion was serially added to ethanol solution containing the Pep23.

**S5.** TEM image of the (a) Co(II)-coordinated Pep23 bundle and schematic pictures of (b)  $\alpha$ -helical Pep23 and (c) Co(II)-coordinated Pep23 bundle.

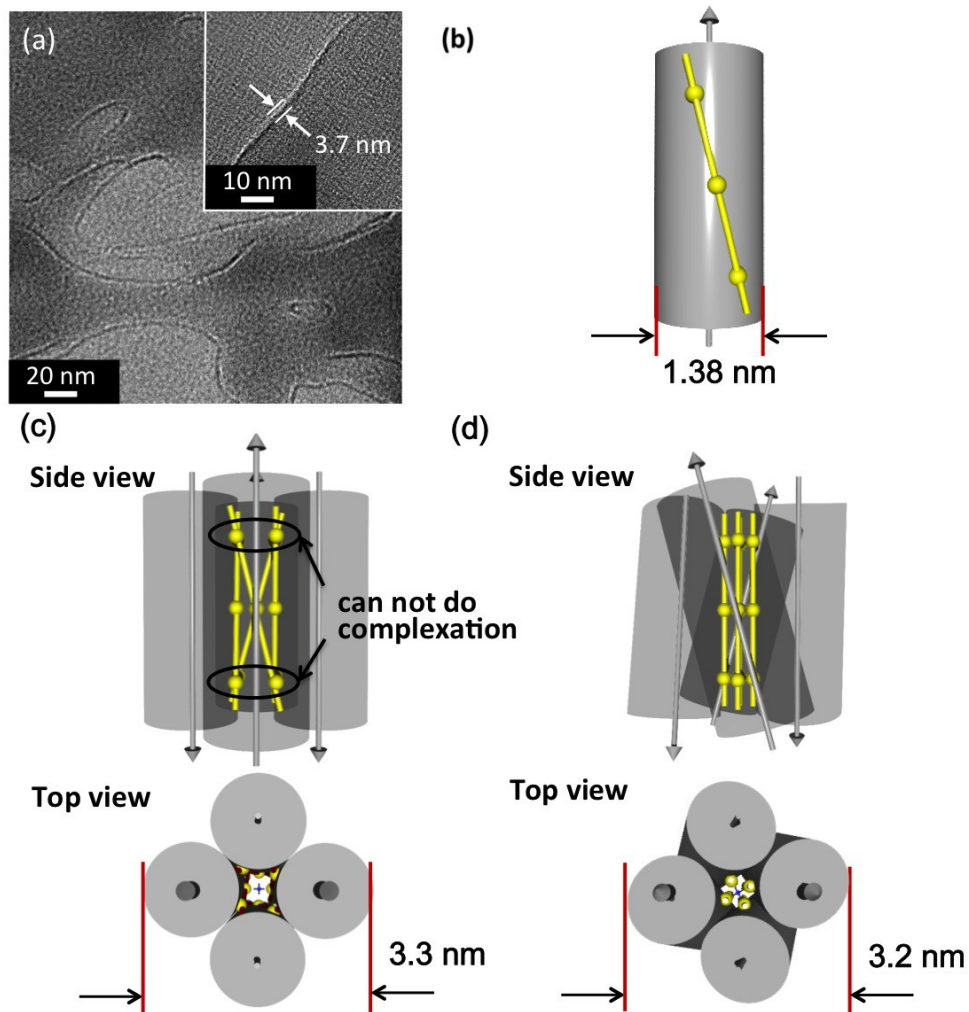

**S6.** MALDI-TOF-MS spectrum of the product obtained by mixing of the Pep23 and TMEOS.

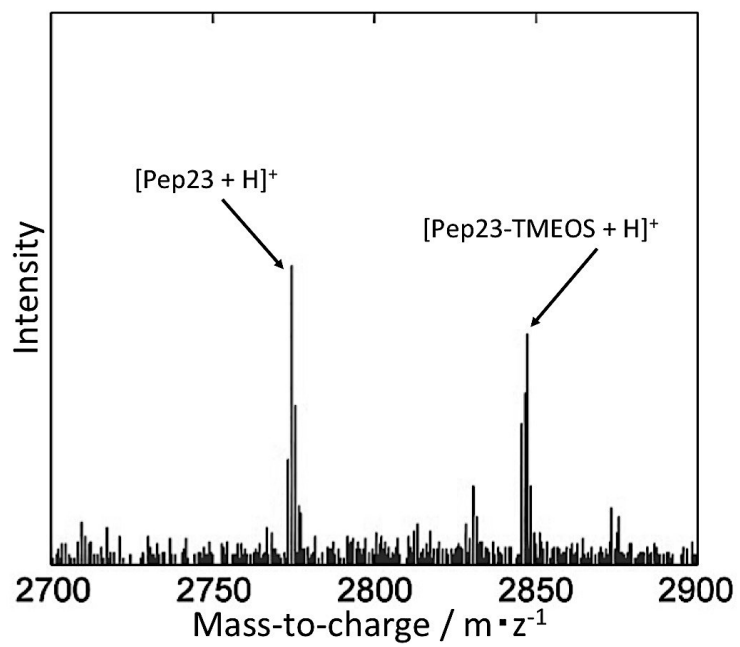

**S7.** *I-V curves of the Co(II)-coordinated Pep23 nanowires bonded between the Lipo-Pep23-modified IDA electrodes prepared under the same experimental condition. We used the IDA electrode that showed the blue I-V curve for the silica mineralization.*

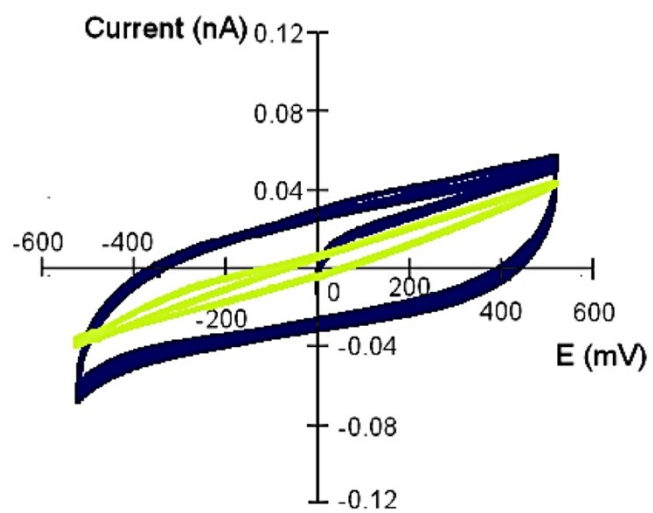

Supplement: c7tb01118k1.pdf [file c7tb01118k1.pdf]
